## Review Article

# Mitochondrial dynamics in macrophages: divide to conquer or unite to survive?

Syeda Farhana Afroz<sup>1,2,3</sup>, Karoline D. Raven<sup>1,2,3</sup>, Grace M.E.P. Lawrence<sup>1,2,3</sup>, Ronan Kapetanovic<sup>4</sup>,  
 Kate Schroder<sup>1,2,3</sup> and  Matthew J. Sweet<sup>1,2,3</sup>

<sup>1</sup>Institute for Molecular Bioscience (IMB), The University of Queensland, Brisbane, QLD 4072, Australia; <sup>2</sup>IMB Centre for Inflammation and Disease Research, The University of Queensland, Brisbane, QLD 4072, Australia; <sup>3</sup>Australian Infectious Diseases Research Centre, The University of Queensland, Brisbane, QLD 4072, Australia; <sup>4</sup>Friedrich Miescher Institute for Biomedical Research, Basel, BS 4058, Switzerland

**Correspondence:** Matthew J. Sweet (m.sweet@imb.uq.edu.au)

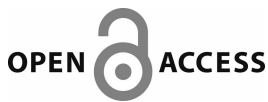

Mitochondria have long been appreciated as the metabolic hub of cells. Emerging evidence also posits these organelles as hubs for innate immune signalling and activation, particularly in macrophages. Macrophages are front-line cellular defenders against endogenous and exogenous threats in mammals. These cells use an array of receptors and downstream signalling molecules to respond to a diverse range of stimuli, with mitochondrial biology implicated in many of these responses. Mitochondria have the capacity to both divide through mitochondrial fission and coalesce through mitochondrial fusion. Mitochondrial dynamics, the balance between fission and fusion, regulate many cellular functions, including innate immune pathways in macrophages. In these cells, mitochondrial fission has primarily been associated with pro-inflammatory responses and metabolic adaptation, so can be considered as a combative strategy utilised by immune cells. In contrast, mitochondrial fusion has a more protective role in limiting cell death under conditions of nutrient starvation. Hence, fusion can be viewed as a cellular survival strategy. Here we broadly review the role of mitochondria in macrophage functions, with a focus on how regulated mitochondrial dynamics control different functional responses in these cells.

## Introduction

Macrophages are innate immune cells with central roles in host defence in mammals. These cells constantly survey their surroundings, using pattern recognition receptors (PRRs) and other detection systems to sense and respond to indicators of danger, for example, infection or injury [1,2]. This results in the engagement of antimicrobial defence systems, coordination of inflammatory responses, priming of adaptive immunity, and initiation of repair processes. Macrophage-expressed PRRs recognise both exogenous pathogen-associated molecular patterns (PAMPs) such as components of microorganisms, as well as endogenous danger signals such as products released from dead or dying cells, tumour cells, and certain mitochondrial components that are collectively referred to as danger-associated molecular patterns (DAMPs). The innate immune system is equipped with diverse families of PRRs, including the toll-like receptors (TLRs), C-type lectin receptors, retinoic acid-inducible gene 1 (RIG-1)-like helicase receptors (RLRs), and nucleotide-binding oligomerization domain-like receptors (NLRs), with each family being comprised of several different receptors [3]. Despite this diversity, there is often overlap in the downstream biological responses that are generated upon sensing PAMPs and/or DAMPs. This may partly reflect the involvement of the mitochondrion, a key organelle integrating extracellular signals, cell metabolism, and biological outputs in macrophages.

The conception of mitochondria as a signalling organelle began with the discovery that the release of cytochrome c from mitochondria initiates a signalling cascade that leads to apoptotic cell death [4,5]. Since then, a vast literature has revealed that mitochondria have central roles in cell activation,

Received: 18 November 2022  
 Revised: 29 January 2023  
 Accepted: 2 February 2023

Version of Record published:  
 23 February 2023

cell survival, and many forms of cell death, with these organelles profoundly influencing numerous biological processes [6,7]. This has been extensively studied in immune responses, where mitochondria regulate both host defence [8] and sterile inflammation [9]. Mitochondria are dynamic organelles that can exist within a spectrum of morphological states within cells. This is governed by the cellular processes of mitochondrial fission and fusion, with the balance between fission and fusion often referred to as mitochondrial dynamics. Mitochondrial dynamics control many cellular pathways, including metabolism [10,11] and inflammatory responses [12–15]. In this review, we briefly describe the role of mitochondria in innate immunity, before focusing on how mitochondrial dynamics influence the metabolic status of macrophages, as well as the functional responses of these cells.

## Mitochondrial biology

Mitochondria are double membrane energy-generating organelles. The endosymbiont theory of mitochondrial origin proposes that a free-living  $\alpha$ -proteobacterium was engulfed by an eukaryotic precursor cell ~2 billion years ago, resulting in a mutually beneficial relationship [16]. During evolution, mitochondria lost most of the proteobacterial genomic materials and transferred many genes to the nuclear genome via endosymbiotic gene transfer [17]. Thus, most mitochondrial components are encoded by the nuclear genome. The small circular mitochondrial genome (mtDNA) mostly encodes translation machinery and components of respiratory chain complexes I, III, IV, and V for carrying out the key mitochondrial function of oxidative phosphorylation (OXPHOS), via the co-ordinated actions of the tricarboxylic acid (TCA) cycle and the electron transport chain (ETC). ETC complexes I, II, and III also generate mitochondrial reactive oxygen species (mROS) which contribute to various functions in innate immunity (see ahead).

## Functions for mitochondria in innate immunity

Beyond their roles in energy generation, mitochondria control diverse cellular processes. In innate immune cells, mitochondria serve as signalling platforms for some PRR pathways, control PRR-inducible metabolic reprogramming, generate free radicals and metabolites that contribute to host defence and inflammation, and provide a reservoir of DAMPs for cellular activation upon disruption of homeostasis (Figure 1). Below we briefly describe examples of each of these.

Mitochondria are intimately connected to many innate immune signalling pathways. One of the most intensely studied examples of this involves the adaptor protein mitochondrial antiviral signalling protein (MAVS) that initiates antiviral responses upon RLR-mediated sensing of cytosolic viral RNA. MAVS is positioned at the mitochondrial outer membrane (OMM) where it forms complexes with the RLRs RIG-I [18] and MDA5 [19] upon activation by viral RNA. This interaction consequently triggers antiviral responses via the transcription factors interferon (IFN) regulatory factor (IRF) 3, IRF7, and nuclear factor- $\kappa$ B (NF- $\kappa$ B), leading to inducible expression of type I IFNs and other antiviral genes [20,21].

The burgeoning field of immunometabolism encompasses the role of mitochondria-regulated metabolism and metabolites in modulating the immune functions of cells, such as macrophages. Mitochondria-mediated metabolic changes alter macrophage functions, particularly their inflammatory and antimicrobial status. In response to lipopolysaccharide (LPS) and other inflammatory stimuli, cells rewire their metabolism from OXPHOS towards aerobic glycolysis, leading to a metabolic shift. For instance, LPS-inducible TLR4-activation redirects metabolic fluxes to generate acetyl-coenzyme A from glucose and increases ATP-citrate lyase activity, thus facilitating inducible histone acetylation in macrophages [22]. Moreover, Jha et al. [23] showed that the metabolites succinate and itaconate accumulate in activated macrophages due to a TLR-inducible break in the TCA cycle. Intriguingly, several studies have revealed that these metabolites have immunomodulatory and/or antimicrobial properties [24–28], though further studies are required to understand the *in vivo* relevance of some of these effects. One possible mechanism underlying metabolic reprogramming could be the translocation of TLR signalling molecules such as ECSIT [29] and STAT3 [30] to mitochondria in macrophages.

Under steady-state conditions, the mitochondrial ETC generates a small amount of ROS; however, this is amplified during cell stress and/or during metabolic adaptations. In macrophages, for example, LPS-inducible metabolic reprogramming leads to succinate accumulation that drives mROS production [25]. The increased mROS can activate pro-inflammatory signalling pathways [31,32], with this linked to many inflammatory conditions, for example, chronic obstructive pulmonary disease [33], chronic kidney disease [34], and type-1 diabetes-associated vascular inflammation [35]. Furthermore, TLR-inducible mROS also contributes to

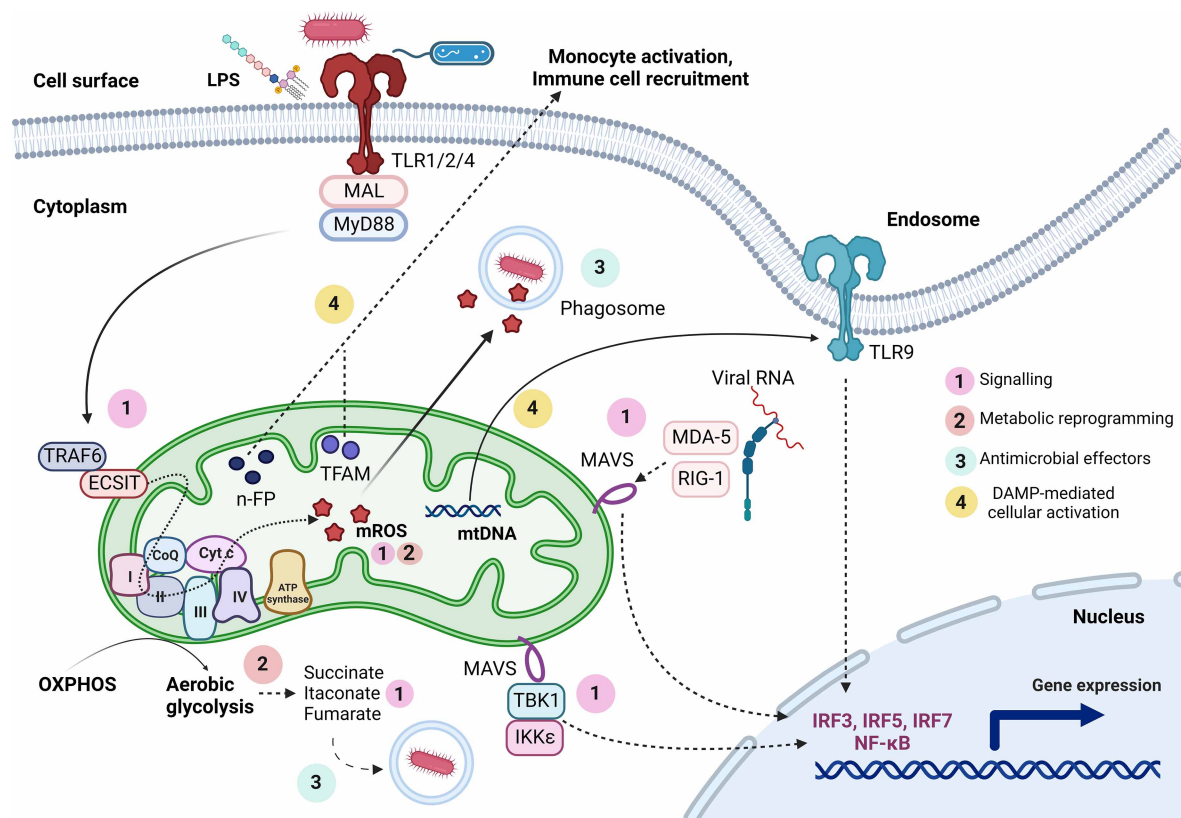

**Figure 1. The multifaceted roles of mitochondria in innate immunity.**

Mitochondria have diverse functions in innate immune cells, including: (1) cell signalling, as exemplified by RLR-mediated engagement of MAVS for antiviral gene expression and TLR-inducible activation of ECSIT via TRAF6, as well as mROS and mitochondria-derived metabolites acting as signalling molecules; (2) metabolic reprogramming, as is apparent during TLR activation in which there is a metabolic shift from OXPHOS to glycolysis, as well as increased production of succinate, itaconate, fumarate, and mROS, all of which have inflammatory and/or antimicrobial roles; (3) generation of antimicrobial responses, with the antimicrobial effector molecule mROS and antibacterial metabolites all being produced downstream of TLR activation; and (4) DAMP-mediated cellular activation, in which mitochondrial DAMPs, such as TFAM, n-FP, and mtDNA, can all trigger innate immune activation. mtDNA, mitochondrial DNA; n-FP, N-formyl peptides; TFAM, mitochondrial transcription factor A. Created with BioRender.com.

macrophage antibacterial responses [29,36]. Such studies have established mROS as an effector molecule of innate immunity.

Owing to their bacterial origin, mitochondria contain DAMPs, such as mtDNA, N-formyl peptides (n-FP), and mitochondrial transcription factor A (TFAM). Release of mitochondrial contents from damaged or necrotic cells can thus initiate sterile inflammation. For example, the concomitant release of n-FP and TFAM from necrotic cells activates monocytes [37] and promotes immune cell recruitment [38], while circulating mtDNA can trigger TLR9-mediated inflammatory responses [39,40] in cardiovascular-related conditions [41,42]. In this way, mitochondrial components can drive innate immune inflammatory responses.

## Mitochondrial dynamics: the interplay between fission and fusion

Mitochondria are dynamic organelles that exist in a continuum of states ranging from long filamentous to small spherical structures. The opposing processes of mitochondrial fission and fusion, referred to as mitochondrial dynamics, co-ordinate, and determine the overall mitochondrial morphology in a cell at any given time

[43]. Mitochondrial dynamics play a vital role in mitochondrial quality control, cell division, and cellular stress responses. Underlying the importance of this process, the genetic deletion of essential regulators of mitochondrial dynamics results in embryonic lethality in mice [44,45]. For example, mice defective in genes required for mitochondrial fusion die in mid-gestation [44], while Wakabayashi et al. [45] demonstrated genetically that fission is essential for mouse embryonic and brain development, as well as mitochondrial morphogenesis, mitotic division, and cell death. In a healthy undisturbed cell, the balance in mitochondrial dynamics is generally skewed more towards a fused interconnected network of mitochondria, although fragmented spherical mitochondria are also normally present. When nutrients are limiting, the mitochondrial pool becomes hyperfused to enable functional cooperativity between mitochondria and cellular protection [46,47]. Conversely, excess nutrients and other stress signals lead to a hyperfragmented mitochondrial population, with fission exceeding fusion. This can have various functional consequences, including initiating apoptosis [48], aiding in metabolic adaptations [49], and regulating energy expenditure [50].

Cells use a specialised set of mechanical GTPases to control mitochondrial dynamics. One such GTPase, dynamin-related protein 1 (DRP1), encoded by *DNM1L*, is essential for mitochondrial fission [51,52]. DRP1 is a cytosolic protein that localises to mitochondria, forming an oligomeric complex upon activation. The act of fission occurs in two sequential steps. First, the endoplasmic reticulum (ER) and actin collaborate to mark a scission site where DRP1 assembles on the OMM. Next, DRP1 monomers form a large oligomer encircling this site, with the GTPase activity of DRP1 then facilitating membrane scission [53–56]. A recent study showed that the ER transmembrane protein CTRP1 directly interacts with DRP1 and facilitates its recruitment to mitochondria, suggesting a mechanism of ER–mitochondrial interaction during the initial stages of fission [57]. Several OMM-localised adaptor proteins have also been implicated in regulating DRP1-dependent fission. These include mitochondrial fission factor (MFF), mitochondrial dynamics of 51 kDa protein (MiD51), MiD49, and mitochondrial fission protein 1 (FIS1) [58–61]. DRP1 can bind to each of these adaptor proteins on the OMM, with the exact mechanisms by which they act being an intense area of current investigation.

MFF can directly bind to DRP1 to facilitate its recruitment, with the absence of MFF in HeLa cells skewing cells towards fusion [60,62]. There are contrasting studies on MiD49- and MiD51-mediated control of mitochondrial dynamics, with evidence that they promote both fission and fusion in different cell types [61,63,64]. Similarly, there may be context-dependent roles for FIS1 in mitochondrial fission. Zhang et al. [65] showed that FIS1 competitively binds to MiD51, suppressing its inhibitory effect on DRP1 to promote mitochondrial fission in a human lung-adenocarcinoma cell line. In contrast, Otera et al. [62] reported that FIS1 was dispensable for fission in HeLa cells. Kleele et al. [66] recently provided key insights into how different adaptor proteins regulate mitochondrial fission in different contexts to enable distinct functional outputs. Specifically, two distinct forms of DRP1-dependent fission were reported, one occurring at the periphery and another at the midzone of mitochondria. Peripheral fission occurs during mitochondrial stress and requires the establishment of FIS1-mediated lysosomal–mitochondrial contact sites. In contrast, midzone fission occurs during mitochondrial proliferation and requires MFF, along with ER- and actin-mediated pre-constriction of mitochondria. In this way, different DRP1 adaptor proteins can engage fission for distinct biological responses, namely quality control of mitochondria and cell division.

Both recruitment of DRP1 to mitochondria, along with its activation, are controlled by several post-translational modifications (PTMs). These include phosphorylation, S-nitrosylation, sumoylation, acetylation, and ubiquitination of specific residues. The contributions of specific PTMs on DRP1 to its activation and functional responses in different cell types are summarised in Table 1. This summary table highlights the diversity in DRP1 PTM sites, as well as in the enzymes involved in mediating these effects in different cell types. It is likely that different PTMs on DRP1 may influence its interactions with different adaptors for initiating or constraining fission, an area of investigation that is still evolving. For example, UV-stimulation of human lung-adenocarcinoma cells decreased phosphorylation of DRP1 at serine (S) 637, thus promoting a DRP1-MFF interaction and enhancing fission during apoptosis [65].

In comparison with fission, fusion requires more stringent regulation by multiple GTPases, both at the OMM and the IMM [67]. The IMM lipid cardiolipin interacts with the GTPase optic atrophy 1 (OPA1) to promote its GTPase activity [68,69], enabling it to initiate IMM fusion. In contrast, the GTPases mitofusin 1 (MFN1) and MFN2 drive OMM fusion [44,68,70]. In addition, two OMM proteins, FAM73a and FAM73b, facilitate fusion downstream of MFNs via the mitochondrial phospholipase D [71]. The fusion-promoting GTPases are also regulated via distinct PTMs. For example, MFN1 and OPA1 deacetylation by the lysine deacetylases HDAC6 [72] and sirtuin 3 [73], respectively, activate these GTPases to promote mitochondrial fusion.

**Table 1. PTM sites on DRP1, along with mechanisms involved (serine, S; alanine, A; threonine, T; cysteine, C; lysine, K; aspartic acid, D; glutamic acid, E; arginine, R)**

| Type of PTM                                  | PTM site          | Responsible enzyme                               | Effect on DRP1 activity                                   | Specific DRP1 point mutations assessed | Cell type                                                  | References                                                   |       |
|----------------------------------------------|-------------------|--------------------------------------------------|-----------------------------------------------------------|----------------------------------------|------------------------------------------------------------|--------------------------------------------------------------|-------|
| Phosphorylation                              | S616              | CDK1/cyclin                                      | Activation                                                | S to A                                 | HeLa cells, human liver cells                              | [125,126]                                                    |       |
|                                              |                   | PKC $\delta$                                     | Activation                                                | —                                      | Mouse cardiomyocytes                                       | [127]                                                        |       |
|                                              |                   | ERK2 (also known as MAPK1)                       | Activation                                                | S to A<br>S to A                       | HEK-TtH cells<br>Huntington's disease mouse striatal cells | [128]<br>[129]                                               |       |
|                                              |                   | PINK1                                            | Activation                                                | S to A<br>S to D<br>S to A<br>S to D   | HEK293 cells<br>Mouse primary neurons                      | [130]<br>[131]                                               |       |
|                                              |                   | CDK5                                             | Activation                                                | S to A<br>S to E                       | Glioblastoma cells                                         | [132,133]                                                    |       |
|                                              | S412 S684         | TBK1                                             | Ca <sup>2+</sup> /calmodulin-dependent kinase II (CaMKII) | Inhibition                             | S to A<br>S to D                                           | Mouse primary neurons                                        | [134] |
|                                              |                   |                                                  |                                                           | Activation                             | S to A                                                     | Rat cardiomyocytes                                           | [135] |
|                                              | S637              | PKA                                              | CaMKIa                                                    | Inhibition                             | S to A<br>S to D                                           | Rat PC12 cells, African green monkey kidney fibroblast cells | [137] |
|                                              |                   |                                                  |                                                           | Inhibition                             | S to A<br>S to D                                           | Rat primary neurons, HeLa cells                              | [138] |
|                                              | T595              | LRRK2                                            |                                                           | Activation                             | T to A<br>T to D                                           | HeLa cells, HEK293T cells                                    | [139] |
|                                              | Dephosphorylation | S637                                             | Calcineurin (also known as PP2B)                          | Activation                             | S to A<br>S to D                                           | Rat PC12 cells, African green monkey kidney fibroblast cells | [137] |
| Neuron-specific PP2A/B $\beta$ 2 phosphatase |                   |                                                  | Activation                                                | —                                      | Mouse hippocampal neurons                                  | [140]                                                        |       |
| S-nitrosylation                              | C644              | Redox-mediated catalysis (donor is nitric oxide) | Activation                                                | C to A                                 | Mouse cerebrocortical neurons                              | [141]                                                        |       |
|                                              | Not indicated     | Protein disulphide isomerase                     | Facilitates DRP1 S616 phosphorylation and activation      | —                                      | Mouse hippocampal neurons                                  | [142]                                                        |       |
| Sumoylation                                  | Not indicated     | SUMO E3 ligase, MAPL                             | Activation                                                | —                                      | HeLa cells                                                 | [143]                                                        |       |
| De-sumoylation                               | Not indicated     | SENP5                                            | Inhibition                                                | —                                      | COS-7 murine fibroblast like cells                         | [144]                                                        |       |
|                                              |                   | K557, K560, K569 or K571                         | SEN3                                                      | Activation                             | K557, 560, 569, and 571 to R                               | Mouse primary cortical neurons                               | [145] |
| Ubiquitination                               | Not indicated     | E3 ubiquitin ligase, MARCH                       | Enhanced DRP1-MFF binding                                 | K557, 560, 569, and 571 to R           | HEK293 cells                                               | [146]                                                        |       |
|                                              |                   |                                                  | Activation                                                | —                                      | HeLa cells                                                 | [147]                                                        |       |
| Acetylation                                  | K642              | Not identified yet                               | Inhibition                                                | —                                      | COS-7 murine fibroblast like cells, HeLa cells             | [148,149]                                                    |       |
|                                              |                   |                                                  | Activation                                                | K to R                                 | Mouse cardiomyocytes                                       | [150]                                                        |       |

In contrast, MFN1 phosphorylation results in its ubiquitin-mediated proteasomal degradation, thus inhibiting fusion [74]. Given the diverse regulatory mechanisms that control each GTPase involved in fission and fusion, it is evident that complex mechanisms connect cell signalling to mitochondrial dynamics, with much yet to be understood about how mitochondrial dynamics are regulated.

## Regulated mitochondrial dynamics in macrophages

Several innate immune stimuli and pathogens modulate and/or disrupt mitochondrial dynamics (Table 2), with this having many consequences for cellular functions (Figure 2). Given the range of stimuli that can affect fission and fusion, it seems likely that multiple PRRs and PRR signalling pathways may converge to modulate mitochondrial dynamics. The consequences of this modulation on macrophage metabolism, inflammatory outputs, phagocytosis, and the host–pathogen dynamic, are discussed below.

## The link between mitochondrial fission and metabolic reprogramming

Alterations in mitochondrial dynamics are interwoven with changes in the metabolic phenotype of a cell. When fusion is favoured over fission, cells generally occupy a catabolic state and generate ATP through OXPHOS [49]. In fibroblasts, fusion was shown to have a causative role in promoting OXPHOS, with this required for cell proliferation [75]. In contrast, a hyperfragmented mitochondrial pool portrays an anabolic state and a shift towards aerobic glycolysis [76]. In cancer cells, one of the rate-limiting enzymes of glycolysis, pyruvate kinase isoform M2, directly binds to MFN2. This interaction results in augmented mitochondrial fusion and a subsequent metabolic shift towards OXPHOS, in this case leading to suppression of cancer cell growth [77]. On the contrary, Nair et al. [10] showed that LPS induces mitochondrial fission and skews metabolism from OXPHOS to glycolysis in primary microglia. They demonstrated that pharmacological inhibition of mitochondrial fission with Mdivi1 [78] reversed this metabolic reprogramming and attenuated LPS-induced pro-inflammatory cytokine and chemokine production in these cells. Similarly, Zhang et al. [11] showed that genetic silencing of *DRP1* inhibited LPS-inducible glycolysis in airway smooth muscle cells, as well as cell proliferation. Thus, growing evidence connects TLR-inducible mitochondrial fission to metabolic reprogramming.

## Mitochondrial dynamics and macrophage inflammatory responses

As discussed above, mROS and mitochondrial metabolites regulate macrophage inflammatory responses. Given the intricate link between mitochondrial dynamics and metabolism, current research in this area is dissecting the role of mitochondrial dynamics in inflammation. Most studies in this area have primarily focused on neuroinflammation [13] and neurodegenerative diseases [79] (see ahead). However, several *in vitro* studies using the primary mouse or human macrophages have investigated specific molecular pathways and inflammatory outputs. For example, LPS triggered mitochondrial fission in both primary human and mouse macrophages, with genetic or pharmacological targeting of *DRP1* in mouse macrophages and embryonic fibroblasts inhibiting the LPS-inducible production of a subset inflammatory mediators including IL-12p40, IL-6, and TNF [12]. Gao et al. [80] also established that LPS- or *Staphylococcus aureus*-mediated activation of *DRP1* in mouse macrophages facilitated the production of the pro-inflammatory cytokine TNF. Furthermore, depletion of the fusion-promoting protein *FAM73b* skewed towards fission, impaired OXPHOS and promoted specific TLR-induced pro-inflammatory responses in murine macrophages and dendritic cells [81]. This resulted in increased *Il12a* expression, as well as decreased *Il10* and *Il23a* expression, enhancing macrophage-mediated anti-tumour immune responses [81]. Similarly, genetic silencing of *MFN2* in primary human macrophages enhanced TLR2-mediated pro-inflammatory outputs [82]. However, *MFN2*-silenced cells showed only a mild mitochondrial fragmentation, with this attributed to compensatory expression of *MFN1* in the absence of *MFN2*. In contrast, Tur et al. demonstrated that *Mfn2*-deficient mouse macrophages were defective in LPS-inducible production of pro-inflammatory cytokines and nitric oxide (NO). However, they did not ascribe this phenotype to defective mitochondrial fusion, rather reduced ROS production. Interestingly, *MFN2* was also shown to be essential for inflammasome activation upon RNA virus infection in mouse macrophages [83], suggestive of a role for mitochondrial fusion in this PRR pathway. In line with this, skewing towards fusion by silencing *Drp1* in murine macrophages increased ERK signalling, leading to subsequent activation of the NLRP3 inflammasome pathway and IL-1 $\beta$  release [84]. These studies on *MFN2* are suggestive of pro-inflammatory functions for fusion, contrasting with the general view that fission and fusion are linked to pro- and anti-inflammatory responses, respectively. However, it is also possible that *MFN2* may have an additional mitochondrial fusion-independent function that may account for these phenotypes. Overall, a growing body of literature has

**Table 2. Modulation of mitochondrial dynamics by innate immune stimuli**

| Stimuli                              | Cell type                                          | Effect on fission or fusion | Functional consequences                             | Evidence                                                          | References |
|--------------------------------------|----------------------------------------------------|-----------------------------|-----------------------------------------------------|-------------------------------------------------------------------|------------|
| <i>Extracellular signals</i>         |                                                    |                             |                                                     |                                                                   |            |
| LPS                                  | Murine macrophages.<br>Murine microglial cells     | Fission ↑                   | Inflammatory cytokines ↑                            | <i>Drp1</i> silencing or treatment with Mdivi1                    | [10,12,81] |
| Succinate                            | Rat cardiomyocytes                                 | Fission ↑                   | Cell apoptosis, myocardial ischaemia injury         | DRP1 recruitment to mitochondria and activation of MFF            | [127]      |
| IL-4                                 | Murine macrophages                                 | Fusion ↑                    | OXPHOS↑                                             | Mitochondrial morphology, <i>MFN1</i> and <i>MFN2</i> ↑           | [81]       |
| TNF                                  | H9C2 cardiomyocytes                                | Fission ↑                   | Cell death during sepsis ↑                          | Inhibition of DRP1 by Rho-associated kinases inhibitor            | [151]      |
| Poly(I:C)                            | HEK293T cells                                      | Fusion ↑                    | Cell survival                                       | TBK1 inhibits mitochondrial aggregation of DRP1                   | [136]      |
| <i>Bacterial infections</i>          |                                                    |                             |                                                     |                                                                   |            |
| <i>Shigella flexneri</i>             | HeLa cells                                         | Fission ↑                   | Cell death ↑<br>Cell-to-cell spreading ↑            | <i>DRP1</i> silencing or treatment with Mdivi1                    | [152]      |
| <i>Legionella pneumophila</i>        | Human macrophages                                  | Fission ↑                   | Glycolysis ↑<br>Bacterial survival ↑                | DRP1 inhibition with Mdivi1                                       | [112]      |
| <i>Chlamydia trachomatis</i>         | HUVECS, HeLa cells                                 | Fusion ↑                    | OXPHOS ↑<br>Bacterial survival ↑                    | DRP1 levels ↓                                                     | [153]      |
| <i>Vibrio cholerae</i>               | HEK cells, CHO cells, HeLa cells                   | Fission ↑                   | Host inflammatory responses ↑                       | Bacterial VopE interacts with Miro GTPases at mitochondria        | [154]      |
| <i>Listeria monocytogenes</i>        | HeLa cells                                         | Fission ↑                   | ATP production ↓<br>Bacterial survival ↑            | Genetic silencing of <i>DRP1</i> , <i>MFN1</i> and <i>MFN2</i>    | [111,155]  |
| <i>Helicobacter pylori</i>           | Human epithelial AZ-521 cells                      | Fission ↑                   | Cell apoptosis ↑                                    | DRP1 inhibition with Mdivi1                                       | [156]      |
| <i>Viral Infections</i>              |                                                    |                             |                                                     |                                                                   |            |
| Dengue virus                         | Human hepatoma 7 cells                             | Fusion ↑                    | Viral replication ↑                                 | DRP1 expression ↓                                                 | [157,158]  |
| Sendai virus                         | HEK293T cells, HeLa cells                          | Fusion ↑                    | Viral persistence, virus detection and signalling ↑ | <i>DRP1</i> , <i>FIS1</i> , <i>OPA1</i> and <i>MFN1</i> silencing | [159]      |
| Venezuelan equine encephalitis virus | U87MG (human glioblastoma cell line)               | Fission ↑                   | Mitophagy, autophagy and cell death ↑               | Inhibition of fission with Mdivi1                                 | [160]      |
| Epstein–Barr virus                   | Gastric and breast cancer cells                    | Fission ↑                   | Cell apoptosis and migration ↑                      | DRP1 levels ↑                                                     | [161]      |
| SARS coronavirus                     | Pulmonary epithelial cells, HEK cells, THP-1 cells | Fusion ↑                    | Innate immune signalling ↓<br>Viral persistence ↑   | DRP1 levels ↓                                                     | [162]      |
| Influenza A virus                    | HEK cells, murine macrophages                      | Fission ↑                   | Antiviral response ↓                                | Influenza A viral protein PB1-F2 localises to mitochondria        | [163,164]  |
| Hepatitis B virus                    | Human hepatoma 7 cells                             | Fission ↑                   | Mitophagy ↑<br>Apoptosis ↓<br>Viral persistence ↑   | DRP1 S616 phosphorylation, MFN2 ubiquitination and degradation    | [165]      |
| Hepatitis C virus                    | Human hepatoma 7 cells                             | Fission ↑                   | Viral persistence ↑<br>Apoptosis↓                   | DRP1 S616 phosphorylation and translocation to mitochondria       | [166]      |

demonstrated that TLR agonists and other inflammatory stimuli alter mitochondrial dynamics (Table 2), with consequent initiation of specific inflammatory responses in macrophages. It should be noted that much of the existing literature on TLR-regulated mitochondrial dynamics has focused on TLR4, however, with additional studies now being required to ascertain whether other TLRs influence this cellular process and downstream biological effects.

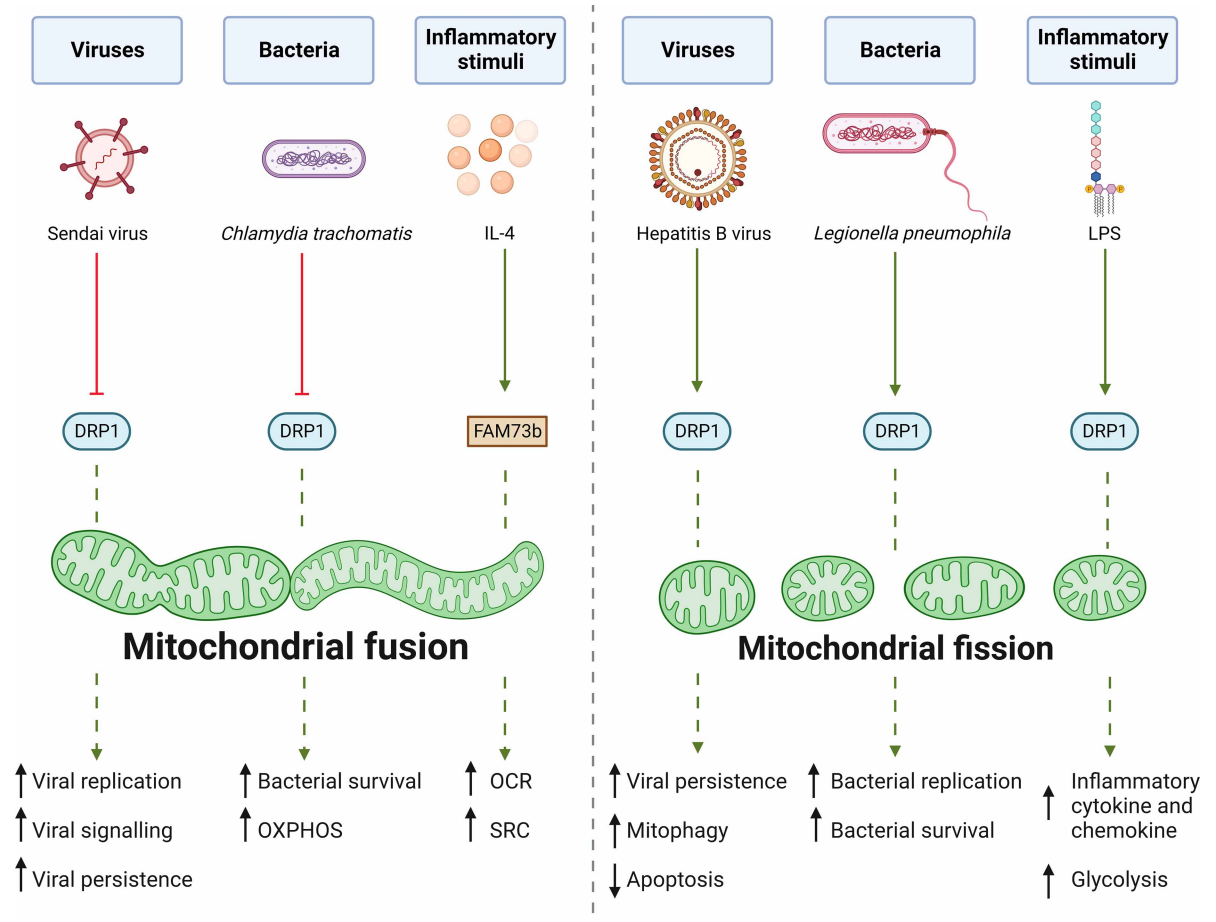

**Figure 2. Modulation of mitochondrial dynamics by inflammatory stimuli and infectious agents.**

Pathogens and inflammatory stimuli can regulate mitochondrial dynamics, driving either mitochondrial fusion or fission depending on the pathogen/stimulus and cellular context. Specific examples of viruses, bacteria, and inflammatory stimuli that drive either mitochondrial fusion or fission are shown. These can affect mitochondrial dynamics through a variety of mechanisms, with modulation of DRP1 being common to many stimuli/pathogens (with the exception of IL-4, which skews towards fusion via the mitochondrial outer membrane protein FAM73b). Pathogen-driven manipulation of mitochondrial dynamics to either fusion or fission can favour pathogen persistence, replication, and/or survival, depending on the nature of the pathogen and cellular context. Red arrows indicate inhibition, green arrows indicate activation, dotted green arrows indicate positive effect on either fusion or fission. OCR, oxygen consumption rate; OXPHOS, oxidative phosphorylation; SRC, spare respiratory capacity. Created with BioRender.com.

## Mitochondrial dynamics and neuroinflammation

As noted above, much of the literature on mitochondrial dynamics and inflammation has focused on neuroinflammation, particularly with respect to microglia. These tissue-resident macrophages of the central nervous system regulate neuronal survival [85], tissue-repair [86], and immunity [87]. However, during infection or injury, microglia may adopt a pro-inflammatory phenotype, releasing cytokines, ROS, and NO [88]. Sustained and chronic release of these inflammatory mediators in the central nervous system is neurotoxic, and may promote neuronal damage [89]. For example, activated microglia are associated with initiating pro-inflammatory signalling to promote neuronal damage in several neurodegenerative diseases, including Parkinson's disease (PD) [90–92] and Alzheimer's disease [93]. Mounting evidence implicates pro-inflammatory microglia in neuroinflammation and neurodegenerative pathology.

Exactly how microglia drive neuroinflammation remains elusive, but several lines of evidence support a role for an axis involving TLR4 and mitochondrial fission. Intraperitoneal injection of LPS initiated microglial



activation, as well as dopaminergic neuron degeneration in mice [94,95]. This suggests that microglial TLR4-mediated pro-inflammatory pathways can drive neurodegeneration. Several studies also showed that LPS drives fission in microglia, with this linked to increased ROS, NO, and pro-inflammatory cytokines (IL-1 $\beta$ , IL-6, TNF) [14,96,97]. Furthermore, inhibition of DRP1 function dampened inducible LPS-induced mRNA expression of *Il1b*, *Il6*, and *Tnf*, as well as intracellular ROS production, in a mouse microglial cell line [98]. Metabolic reprogramming from oxidative phosphorylation to glycolysis is required for microglia to adopt a pro-inflammatory phenotype [99], and as noted above, mitochondrial fission was required for this metabolic switch in microglia [10]. These data thus suggest that TLR4-mediated mitochondrial fission may enhance pro-inflammatory phenotypes in microglia. Interestingly, increased mitochondrial fission has also been observed in pro-inflammatory astrocytes *in vitro* [15], suggesting a conserved role for mitochondrial fission across multiple cell types during neuroinflammation.

Another possible mechanism of mitochondrial fission perpetuating neuroinflammation is via enhanced microglial NLRP3 signalling. It is established that mitochondrial dysfunction primes and/or engages the NLRP3 inflammasome. For example, mROS and mtDNA trigger assembly and activation of the cytosolic NLRP3 inflammasome, as well as pro-inflammatory responses via IL-1 $\beta$  release and cell death [100–102]. In mouse macrophages, skewing towards fusion suppressed the release of the inflammasome-dependent cytokine IL-1 $\beta$  [12]. Furthermore, antagonising mitochondrial fission in PD models reduced brain tissue expression of NLRP3 and NLRP3 signalling components, which were otherwise elevated in the brain tissue of rats with a PD-like phenotype [103]. Similarly, intraperitoneal administration of the fission-inhibiting compound Mdivi1 in an acute kidney injury model in mice significantly down-regulated the expression of NLRP3 and inflammasome-related proteins in kidney tissue [104]. This suggests that mitochondrial fission may contribute to the priming of inflammasome responses during neuroinflammation, as well as other inflammatory conditions. Moreover, the administration of mitochondrial fission inhibitors *in vivo* was neuroprotective in several animal models of neurodegenerative disease. For example, intraperitoneal injection of Mdivi1 protected against dopaminergic neuron damage in a rat model of PD [105]. Similarly, another mitochondrial fission inhibitor, P110 [106], prevented the loss of dopaminergic neurons and improved motor ability in a PD mouse model [107]. The specific mechanisms involved are not well understood, but collectively these data suggest that mitochondrial fission may contribute to neuroinflammation and progressive neurodegenerative disease.

## Mitochondrial dynamics and phagocytosis

A few studies have documented key roles for mitochondrial dynamics in macrophage phagocytic responses [108–110]. Wang et al. [108] demonstrated that initial apoptotic cell uptake triggers DRP1-dependent fission in murine macrophages, with this facilitating continued clearance of the apoptotic cells. The importance of fission in this efferocytosis response was validated *in vivo* using myeloid-specific *Drp1*-knockout mice. Consistent with these findings, tumour cells resist phagocytosis by human macrophages by inhibiting mitochondrial fission in these cells, and this pathway can be targeted for effective antibody therapy against several malignancies [109]. In contrast with the pro-phagocytic activity of fission, the fusion-mediating protein MFN2 was also required for phagocytosis, as demonstrated using myeloid-specific *Mfn2*-knockout mice [110].

## Mitochondrial dynamics and host defence

As evident in Table 2, a wide array of pathogens can modulate mitochondrial dynamics, with the functional consequences of this being either detrimental or beneficial for the pathogen. This may reflect different roles for mitochondrial dynamics in different cell types, different kinetics, and/or the specific pathogen being studied. For example, *Listeria monocytogenes* skewed mitochondrial dynamics towards fission in HeLa cells transiently, with mitochondria shifting back towards a more fused state over time [111]. Depleting *MFN1* and *MFN2* in these cells prolonged fission and impaired *Listeria* survival, while depleting *DRP1* skewed towards fusion and favoured bacterial survival. Hence, it was postulated that the transient nature of mitochondrial fission in these cells may reflect pathogen subversion to support intracellular survival. In contrast with this study in HeLa cells, myeloid-specific *Mfn2*-knockout mice have fission-skewed macrophages and were more vulnerable to septic shock, as well as *L. monocytogenes* and *Mycobacterium tuberculosis* infection [110]. Similarly, *Legionella pneumophila* triggered mitochondrial fission and a shift towards aerobic glycolysis in human macrophages [112], with pharmacological targeting of DRP1 decreasing intracellular survival of this bacterial pathogen in these cells [78]. Such studies suggest that regulated mitochondrial dynamics may influence the host–pathogen

dynamic and antimicrobial defence; however, there are major knowledge gaps regarding the underlying mechanistic details of this pathway and how it applies to different pathogens.

## Conclusions and future directions

Although various inflammatory stimuli can modulate mitochondrial dynamics, a detailed molecular understanding of how different PRR signalling pathways exert these effects in macrophages is yet to emerge. Based on the variety of regulated PTMs on DRP1 alone, it can be speculated that altered mitochondrial dynamics is rather a universal response to many stimuli; however, the precise mechanisms involved may depend on the specific PAMP-PRR signalling pathway and/or cell type. Deconvoluting these mechanisms will be an interesting area of future research. Furthermore, different mechanisms of DRP1 activation, for example through distinct PTMs, may alter mitochondrial dynamics in different ways to elicit distinct functional outcomes. This may also be achieved through regulated or cell type-specific expression of different *DRP1* transcriptional variants, of which there are many [113]. This gene regulation-mediated mechanism could also enable isoform-specific PTMs and/or functions of DRP1 [114], including differential interactions with OMM adaptor proteins such as MFF [115]. Of note, DRP1 can also shape and fragment other organelles, such as the ER and peroxisomes [116,117]. Thus, careful consideration should be taken before attributing specific biological effects to mitochondrial dynamics, based on DRP1 manipulation alone.

Another interesting research direction for the future involves the potential control of macrophage functions by intercellular transfer of mitochondria [118]. Tunnelling nanotubes for intercellular mitochondrial transfer have been studied in different contexts, such as between cancer and immune cells [119], as well as between mesenchymal stem cells and macrophages during acute respiratory distress syndrome [120]. Brestoff et al. [121] also reported immunometabolic cross-talk between adipocytes and macrophages to regulate metabolic homeostasis in obesity. A subsequent study showed that macrophages transfer mitochondria from white adipose tissue to distant organs, such as the heart, via the circulation to facilitate metabolic adaptation during nutrient stress [122]. An intriguing question in this regard is whether mitochondrial dynamics are affected during such intercellular mitochondrial transfer, both in the recipient and donor cells. Whether there is interplay between mitochondrial dynamics and mitochondrial nanotunnels [123] and/or inter-mitochondrial junctions [124] to regulate organelle behaviour and cell–cell communication will also be interesting areas of future investigation. Finally, the continued assessment of myeloid-specific knockouts of *Drp1*, *Mfn1*, *Mfn2*, and/or other genes controlling mitochondrial dynamics in different animal models of inflammatory and infectious diseases will be informative for understanding the *in vivo* functions of mitochondrial dynamics in macrophages in health and disease.

## Perspectives

- Mitochondria have multifaceted roles in innate immunity. Many inflammatory stimuli and pathogens regulate mitochondrial dynamics in macrophages.
- Regulated mitochondrial dynamics control metabolic and inflammatory responses in macrophages. In myeloid cells, mitochondrial fission drives inducible glycolysis, production of specific inflammatory mediators, neuroinflammation, and phagocytosis.
- Future investigations into mitochondrial dynamics in macrophages should focus on defining the precise molecular mechanisms by which innate immune stimuli modulate mitochondrial dynamics, the downstream mechanisms that link regulated mitochondrial dynamics to biological effects, and the contributions of mitochondrial fission and fusion to homeostatic and disease processes *in vivo*.

## Competing Interests

The authors declare that there are no competing interests associated with the manuscript.

## Funding

M.J.S. and K.S. acknowledge the support of Australian National Health and Medical Research Council (NHMRC) Investigator Grants [APP1194406 to M.J.S.; APP2009075 to K.S.]. S.F.A., K.D.R. and G.M.E.P.L. were supported by RTP scholarships from The University of Queensland. R.K. was supported by the European Union's Horizon 2020 research and innovation programme under the Marie Skłodowska-Curie grant agreement no. [894690].

## Open Access

Open access for this article was enabled by the participation of the University of Queensland in an all-inclusive *Read & Publish* agreement with Portland Press and the Biochemical Society under a transformative agreement with CAUL.

## Author Contributions

S.F.A., M.J.S., K.D.R. and G.M.E.P.L. contributed to the conception and drafting of the manuscript. R.K. and K.S. reviewed and edited the manuscript.

## Abbreviations

DAMP, danger-associated molecular pattern; DRP1, dynamin-related protein 1; ECSIT, evolutionarily conserved signalling intermediate in Toll pathways; ETC, electron transport chain; FIS1, mitochondrial fission protein 1; IKK, inhibitor of nuclear factor- $\kappa$ B ( $\kappa$ B) kinase; IMM, inner mitochondrial membrane; LPS, lipopolysaccharide; MAL, MyD88-adaptor-like; MAVS, mitochondrial antiviral signalling protein; MDA-5, melanoma differentiation-associated gene 5; MFF, mitochondrial fission factor; MFN, mitofusin; NLRP3, NOD-, LRR- and pyrin domain-containing protein 3; OMM, outer mitochondrial membrane; OXPHOS, oxidative phosphorylation; PAMP, pathogen-associated molecular pattern; PRR, pattern recognition receptor; PTM, post-translational modification; RLR, retinoic acid-inducible gene 1 (RIG-1)-like helicase receptor; ROS, reactive oxygen species; TBK1, TANK-binding kinase 1; TCA, tricarboxylic acid; TFAM, mitochondrial transcription factor A; TLR, Toll-like receptor; TRAF6, tumour necrosis factor receptor-associated factor 6.

## References

- 1 Hirayama, D., Iida, T. and Nakase, H. (2017) The phagocytic function of macrophage-enforcing innate immunity and tissue homeostasis. *Int. J. Mol. Sci.* **19**, 92 <https://doi.org/10.3390/ijms19010092>
- 2 Wynn, T.A. and Vannella, K.M. (2016) Macrophages in tissue repair, regeneration, and fibrosis. *Immunity* **44**, 450–462 <https://doi.org/10.1016/j.immuni.2016.02.015>
- 3 Mogensen, T.H. (2009) Pathogen recognition and inflammatory signaling in innate immune defenses. *Clin. Microbiol. Rev.* **22**, 240–273 <https://doi.org/10.1128/CMR.00046-08>
- 4 Chandel, N.S. (2014) Mitochondria as signaling organelles. *BMC Biol.* **12**, 34 <https://doi.org/10.1186/1741-7007-12-34>
- 5 Yang, J., Liu, X., Bhalla, K., Kim, C.N., Ibrado, A.M., Cai, J. et al. (1997) Prevention of apoptosis by Bcl-2: release of cytochrome c from mitochondria blocked. *Science* **275**, 1129–1132 <https://doi.org/10.1126/science.275.5303.1129>
- 6 Aon, M.A. and Camara, A.K. (2015) Mitochondria: hubs of cellular signaling, energetics and redox balance. A rich, vibrant, and diverse landscape of mitochondrial research. *Front. Physiol.* **6**, 94 <https://doi.org/10.3389/fphys.2015.00094>
- 7 Aguilar-Lopez, B.A., Moreno-Altamirano, M.M.B., Dockrell, H.M., Duchon, M.R. and Sanchez-Garcia, F.J. (2020) Mitochondria: an integrative hub coordinating circadian rhythms, metabolism, the microbiome, and immunity. *Front. Cell Dev. Biol.* **8**, 51 <https://doi.org/10.3389/fcell.2020.00051>
- 8 Tikku, V., Tan, M.W. and Dikic, I. (2020) Mitochondrial functions in infection and immunity. *Trends Cell Biol.* **30**, 263–275 <https://doi.org/10.1016/j.tcb.2020.01.006>
- 9 Grazioli, S. and Pugin, J. (2018) Mitochondrial damage-associated molecular patterns: from inflammatory signaling to human diseases. *Front. Immunol.* **9**, 832 <https://doi.org/10.3389/fimmu.2018.00832>
- 10 Nair, S., Sobotka, K.S., Joshi, P., Gressens, P., Fleiss, B., Thornton, C. et al. (2019) Lipopolysaccharide-induced alteration of mitochondrial morphology induces a metabolic shift in microglia modulating the inflammatory response in vitro and in vivo. *Glia* **67**, 1047–1061 <https://doi.org/10.1002/glia.23587>
- 11 Zhang, L., Ma, C., Wang, X., He, S., Li, Q., Zhou, Y. et al. (2019) Lipopolysaccharide-induced proliferation and glycolysis in airway smooth muscle cells via activation of Drp1. *J. Cell Physiol.* **234**, 9255–9263 <https://doi.org/10.1002/jcp.27605>
- 12 Kapetanovic, R., Afroz, S.F., Ramnath, D., Lawrence, G.M., Okada, T., Curson, J.E. et al. (2020) Lipopolysaccharide promotes Drp1-dependent mitochondrial fission and associated inflammatory responses in macrophages. *Immunol. Cell Biol.* **98**, 528–539 <https://doi.org/10.1111/imcb.12363>
- 13 de Oliveira, L.G., Angelo, Y.S., Iglesias, A.H. and Peron, J.P.S. (2021) Unraveling the link between mitochondrial dynamics and neuroinflammation. *Front. Immunol.* **12**, 624919 <https://doi.org/10.3389/fimmu.2021.624919>
- 14 Park, J., Choi, H., Min, J.S., Park, S.J., Kim, J.H., Park, H.J. et al. (2013) Mitochondrial dynamics modulate the expression of pro-inflammatory mediators in microglial cells. *J. Neurochem.* **127**, 221–232 <https://doi.org/10.1111/jnc.12361>
- 15 Joshi, A.U., Minhas, P.S., Liddel, S.A., Haileselassie, B., Andreasson, K.I., Dorn, II, G.W. et al. (2019) Fragmented mitochondria released from microglia trigger A1 astrocytic response and propagate inflammatory neurodegeneration. *Nat. Neurosci.* **22**, 1635–1648 <https://doi.org/10.1038/s41593-019-0486-0>

- 16 Lane, N. and Martin, W. (2010) The energetics of genome complexity. *Nature* **467**, 929–934 <https://doi.org/10.1038/nature09486>
- 17 Gray, M.W. (2015) Mosaic nature of the mitochondrial proteome: implications for the origin and evolution of mitochondria. *Proc. Natl Acad. Sci. U.S.A.* **112**, 10133–10138 <https://doi.org/10.1073/pnas.1421379112>
- 18 Yoneyama, M., Kikuchi, M., Natsukawa, T., Shinobu, N., Imaizumi, T., Miyagishi, M. et al. (2004) The RNA helicase RIG-I has an essential function in double-stranded RNA-induced innate antiviral responses. *Nat. Immunol.* **5**, 730–737 <https://doi.org/10.1038/ni1087>
- 19 Andrejeva, J., Childs, K.S., Young, D.F., Carlos, T.S., Stock, N., Goodbourn, S. et al. (2004) The V proteins of paramyxoviruses bind the IFN-inducible RNA helicase, mda-5, and inhibit its activation of the IFN-beta promoter. *Proc. Natl Acad. Sci. U.S.A.* **101**, 17264–17269 <https://doi.org/10.1073/pnas.0407639101>
- 20 Fitzgerald, K.A., McWhirter, S.M., Faia, K.L., Rowe, D.C., Latz, E., Golenbock, D.T. et al. (2003) IKKepsilon and TBK1 are essential components of the IRF3 signaling pathway. *Nat. Immunol.* **4**, 491–496 <https://doi.org/10.1038/ni921>
- 21 Guo, B. and Cheng, G. (2007) Modulation of the interferon antiviral response by the TBK1/IKKi adaptor protein TANK. *J. Biol. Chem.* **282**, 11817–11826 <https://doi.org/10.1074/jbc.M700017200>
- 22 Lauterbach, M.A., Hanke, J.E., Serefidou, M., Mangan, M.S.J., Kolbe, C.C., Hess, T. et al. (2019) Toll-like receptor signaling rewires macrophage metabolism and promotes histone acetylation via ATP-citrate lyase. *Immunity* **51**, 997–1011.e7 <https://doi.org/10.1016/j.immuni.2019.11.009>
- 23 Jha, A.K., Huang, S.C., Sergushichev, A., Lampropoulou, V., Ivanova, Y., Loginicheva, E. et al. (2015) Network integration of parallel metabolic and transcriptional data reveals metabolic modules that regulate macrophage polarization. *Immunity* **42**, 419–430 <https://doi.org/10.1016/j.immuni.2015.02.005>
- 24 Tannahill, G.M., Curtis, A.M., Adamik, J., Palsson-McDermott, E.M., McGettrick, A.F., Goel, G. et al. (2013) Succinate is an inflammatory signal that induces IL-1beta through HIF-1alpha. *Nature* **496**, 238–242 <https://doi.org/10.1038/nature11986>
- 25 Mills, E.L., Kelly, B., Logan, A., Costa, A.S.H., Varma, M., Bryant, C.E. et al. (2016) Succinate dehydrogenase supports metabolic repurposing of mitochondria to drive inflammatory macrophages. *Cell* **167**, 457–470.e13 <https://doi.org/10.1016/j.cell.2016.08.064>
- 26 Michelucci, A., Cordes, T., Ghelfi, J., Pailot, A., Reiling, N., Goldmann, O. et al. (2013) Immune-responsive gene 1 protein links metabolism to immunity by catalyzing itaconic acid production. *Proc. Natl Acad. Sci. U.S.A.* **110**, 7820–7825 <https://doi.org/10.1073/pnas.1218599110>
- 27 Mills, E.L., Ryan, D.G., Prag, H.A., Dikovskaya, D., Menon, D., Zaslona, Z. et al. (2018) Itaconate is an anti-inflammatory metabolite that activates Nrf2 via alkylation of KEAP1. *Nature* **556**, 113–117 <https://doi.org/10.1038/nature25986>
- 28 Lampropoulou, V., Sergushichev, A., Bambouskova, M., Nair, S., Vincent, E.E., Loginicheva, E. et al. (2016) Itaconate links inhibition of succinate dehydrogenase with macrophage metabolic remodeling and regulation of inflammation. *Cell Metab.* **24**, 158–166 <https://doi.org/10.1016/j.cmet.2016.06.004>
- 29 West, A.P., Brodsky, I.E., Rahner, C., Woo, D.K., Erdjument-Bromage, H., Tempst, P. et al. (2011) TLR signalling augments macrophage bactericidal activity through mitochondrial ROS. *Nature* **472**, 476–480 <https://doi.org/10.1038/nature09973>
- 30 Balic, J.J., Albargy, H., Luu, K., Kirby, F.J., Jayasekara, W.S.N., Mansell, F. et al. (2020) STAT3 serine phosphorylation is required for TLR4 metabolic reprogramming and IL-1beta expression. *Nat. Commun.* **11**, 3816 <https://doi.org/10.1038/s41467-020-17669-5>
- 31 Wu, J., Yan, Z., Schwartz, D.E., Yu, J., Malik, A.B. and Hu, G. (2013) Activation of NLRP3 inflammasome in alveolar macrophages contributes to mechanical stretch-induced lung inflammation and injury. *J. Immunol.* **190**, 3590–3599 <https://doi.org/10.4049/jimmunol.1200860>
- 32 Zhou, R., Yazdi, A.S., Menu, P. and Tschopp, J. (2011) A role for mitochondria in NLRP3 inflammasome activation. *Nature* **469**, 221–225 <https://doi.org/10.1038/nature09663>
- 33 Wiegman, C.H., Michaeloudes, C., Haji, G., Narang, P., Clarke, C.J., Russell, K.E. et al. (2015) Oxidative stress-induced mitochondrial dysfunction drives inflammation and airway smooth muscle remodeling in patients with chronic obstructive pulmonary disease. *J. Allergy Clin. Immunol.* **136**, 769–780 <https://doi.org/10.1016/j.jaci.2015.01.046>
- 34 Tirichen, H., Yaigoub, H., Xu, W., Wu, C., Li, R. and Li, Y. (2021) Mitochondrial reactive oxygen species and their contribution in chronic kidney disease progression through oxidative stress. *Front. Physiol.* **12**, 627837 <https://doi.org/10.3389/fphys.2021.627837>
- 35 Pereira, C.A., Carlos, D., Ferreira, N.S., Silva, J.F., Zanotto, C.Z., Zamboni, D.S. et al. (2019) Mitochondrial DNA promotes NLRP3 inflammasome activation and contributes to endothelial dysfunction and inflammation in type 1 diabetes. *Front. Physiol.* **10**, 1557 <https://doi.org/10.3389/fphys.2019.01557>
- 36 Patoli, D., Mignotte, F., Deckert, V., Dusuel, A., Dumont, A., Rieu, A. et al. (2020) Inhibition of mitophagy drives macrophage activation and antibacterial defense during sepsis. *J. Clin. Invest.* **130**, 5858–5874 <https://doi.org/10.1172/JCI130996>
- 37 Crouser, E.D., Shao, G., Julian, M.W., Macre, J.E., Shadel, G.S., Tridandapani, S. et al. (2009) Monocyte activation by necrotic cells is promoted by mitochondrial proteins and formyl peptide receptors. *Crit. Care Med.* **37**, 2000–2009 <https://doi.org/10.1097/CCM.0b013e3181a001ae>
- 38 Pittman, K. and Kubers, P. (2013) Damage-associated molecular patterns control neutrophil recruitment. *J. Innate Immun.* **5**, 315–323 <https://doi.org/10.1159/000347132>
- 39 Collins, L.V., Hajizadeh, S., Holme, E., Jonsson, I.M. and Tarkowski, A. (2004) Endogenously oxidized mitochondrial DNA induces in vivo and in vitro inflammatory responses. *J. Leukoc. Biol.* **75**, 995–1000 <https://doi.org/10.1189/jlb.0703328>
- 40 Zhang, Q., Raof, M., Chen, Y., Sumi, Y., Sursal, T., Junger, W. et al. (2010) Circulating mitochondrial DAMPs cause inflammatory responses to injury. *Nature* **464**, 104–107 <https://doi.org/10.1038/nature08780>
- 41 Oka, T., Hkoso, S., Yamaguchi, O., Taneike, M., Takeda, T., Tamai, T. et al. (2012) Mitochondrial DNA that escapes from autophagy causes inflammation and heart failure. *Nature* **485**, 251–255 <https://doi.org/10.1038/nature10992>
- 42 Nakayama, H. and Otsu, K. (2018) Mitochondrial DNA as an inflammatory mediator in cardiovascular diseases. *Biochem. J.* **475**, 839–852 <https://doi.org/10.1042/BCJ20170714>
- 43 Sesaki, H. and Jensen, R.E. (1999) Division versus fusion: Dnm1p and Fzo1p antagonistically regulate mitochondrial shape. *J. Cell Biol.* **147**, 699–706 <https://doi.org/10.1083/jcb.147.4.699>
- 44 Chen, H., Detmer, S.A., Ewald, A.J., Griffin, E.E., Fraser, S.E. and Chan, D.C. (2003) Mitofusins Mfn1 and Mfn2 coordinately regulate mitochondrial fusion and are essential for embryonic development. *J. Cell Biol.* **160**, 189–200 <https://doi.org/10.1083/jcb.200211046>
- 45 Wakabayashi, J., Zhang, Z., Wakabayashi, N., Tamura, Y., Fukaya, M., Kensler, T.W. et al. (2009) The dynamin-related GTPase Drp1 is required for embryonic and brain development in mice. *J. Cell Biol.* **186**, 805–816 <https://doi.org/10.1083/jcb.200903065>
- 46 Rambold, A.S., Kostecky, B., Elia, N. and Lippincott-Schwartz, J. (2011) Tubular network formation protects mitochondria from autophagosomal degradation during nutrient starvation. *Proc. Natl Acad. Sci. U.S.A.* **108**, 10190–10195 <https://doi.org/10.1073/pnas.1107402108>

- 47 Blackstone, C. and Chang, C.R. (2011) Mitochondria unite to survive. *Nat. Cell Biol.* **13**, 521–522 <https://doi.org/10.1038/ncb0511-521>
- 48 Molina, A.J., Wikstrom, J.D., Stiles, L., Las, G., Mohamed, H., Elorza, A. et al. (2009) Mitochondrial networking protects beta-cells from nutrient-induced apoptosis. *Diabetes* **58**, 2303–2315 <https://doi.org/10.2337/db07-1781>
- 49 Liu, X. and Hajnoczky, G. (2011) Altered fusion dynamics underlie unique morphological changes in mitochondria during hypoxia-reoxygenation stress. *Cell Death Differ.* **18**, 1561–1572 <https://doi.org/10.1038/cdd.2011.13>
- 50 Wikstrom, J.D., Mahdaviyani, K., Liesa, M., Sereda, S.B., Si, Y., Las, G. et al. (2014) Hormone-induced mitochondrial fission is utilized by brown adipocytes as an amplification pathway for energy expenditure. *EMBO J.* **33**, 418–436 <https://doi.org/10.1002/emboj.201385014>
- 51 Bleazard, W., McCaffery, J.M., King, E.J., Bale, S., Mozdy, A., Tieu, Q. et al. (1999) The dynamin-related GTPase Dnm1 regulates mitochondrial fission in yeast. *Nat. Cell Biol.* **1**, 298–304 <https://doi.org/10.1038/13014>
- 52 Fonseca, T.B., Sanchez-Guerrero, A., Milosevic, I. and Raimundo, N. (2019) Mitochondrial fission requires DRP1 but not dynamins. *Nature* **570**, E34–E42 <https://doi.org/10.1038/s41586-019-1296-y>
- 53 Legesse-Miller, A., Massol, R.H. and Kirchhausen, T. (2003) Constriction and Dnm1p recruitment are distinct processes in mitochondrial fission. *Mol. Biol. Cell* **14**, 1953–1963 <https://doi.org/10.1091/mbc.e02-10-0657>
- 54 Friedman, J.R., Lackner, L.L., West, M., DiBenedetto, J.R., Nunnari, J. and Voeltz, G.K. (2011) ER tubules mark sites of mitochondrial division. *Science* **334**, 358–362 <https://doi.org/10.1126/science.1207385>
- 55 Prudent, J. and McBride, H.M. (2016) Mitochondrial dynamics: ER actin tightens the Drp1 noose. *Curr. Biol.* **26**, R207–R209 <https://doi.org/10.1016/j.cub.2016.01.009>
- 56 Ji, W.K., Hatch, A.L., Merrill, R.A., Strack, S. and Higgs, H.N. (2015) Actin filaments target the oligomeric maturation of the dynamin GTPase Drp1 to mitochondrial fission sites. *eLife* **4**, e11553 <https://doi.org/10.7554/eLife.11553>
- 57 Sonn, S.K., Seo, S., Yang, J., Oh, K.S., Chen, H., Chan, D.C. et al. (2021) ER-associated CTRP1 regulates mitochondrial fission via interaction with DRP1. *Exp. Mol. Med.* **53**, 1769–1780 <https://doi.org/10.1038/s12276-021-00701-z>
- 58 Smirnova, E., Griparic, L., Shurland, D.L. and van der Bliek, A.M. (2001) Dynamin-related protein Drp1 is required for mitochondrial division in mammalian cells. *Mol. Biol. Cell* **12**, 2245–2256 <https://doi.org/10.1091/mbc.12.8.2245>
- 59 Yoon, Y., Krueger, E.W., Oswald, B.J. and McNiven, M.A. (2003) The mitochondrial protein hFis1 regulates mitochondrial fission in mammalian cells through an interaction with the dynamin-like protein DLP1. *Mol. Cell Biol.* **23**, 5409–5420 <https://doi.org/10.1128/MCB.23.15.5409-5420.2003>
- 60 Gandre-Babbe, S. and van der Bliek, A.M. (2008) The novel tail-anchored membrane protein Mff controls mitochondrial and peroxisomal fission in mammalian cells. *Mol. Biol. Cell* **19**, 2402–2412 <https://doi.org/10.1091/mbc.E07-12-1287>
- 61 Zhao, J., Liu, T., Jin, S., Wang, X., Qu, M., Uhlen, P. et al. (2011) Human MIEF1 recruits Drp1 to mitochondrial outer membranes and promotes mitochondrial fusion rather than fission. *EMBO J.* **30**, 2762–2778 <https://doi.org/10.1038/emboj.2011.198>
- 62 Otera, H., Wang, C., Cleland, M.M., Setoguchi, K., Yokota, S., Youle, R.J. et al. (2010) Mff is an essential factor for mitochondrial recruitment of Drp1 during mitochondrial fission in mammalian cells. *J. Cell Biol.* **191**, 1141–1158 <https://doi.org/10.1083/jcb.201007152>
- 63 Loson, O.C., Song, Z., Chen, H. and Chan, D.C. (2013) Fis1, Mff, MID49, and MID51 mediate Drp1 recruitment in mitochondrial fission. *Mol. Biol. Cell* **24**, 659–667 <https://doi.org/10.1091/mbc.E12-10-0721>
- 64 Liu, T., Yu, R., Jin, S.B., Han, L., Lendahl, U., Zhao, J. et al. (2013) The mitochondrial elongation factors MIEF1 and MIEF2 exert partially distinct functions in mitochondrial dynamics. *Exp. Cell Res.* **319**, 2893–2904 <https://doi.org/10.1016/j.yexcr.2013.07.010>
- 65 Zhang, Z., Liu, L., Wu, S. and Xing, D. (2016) Drp1, Mff, Fis1, and MID51 are coordinated to mediate mitochondrial fission during UV irradiation-induced apoptosis. *FASEB J.* **30**, 466–476 <https://doi.org/10.1096/fj.15-274258>
- 66 Kleele, T., Rey, T., Winter, J., Zaganelli, S., Mahecic, D., Perreten Lambert, H. et al. (2021) Distinct fission signatures predict mitochondrial degradation or biogenesis. *Nature* **593**, 435–439 <https://doi.org/10.1038/s41586-021-03510-6>
- 67 Scott, I. and Youle, R.J. (2010) Mitochondrial fission and fusion. *Essays Biochem.* **47**, 85–98 <https://doi.org/10.1042/bse0470085>
- 68 Ban, T., Ishihara, T., Kohno, H., Saita, S., Ichimura, A., Maenaka, K. et al. (2017) Molecular basis of selective mitochondrial fusion by heterotypic action between OPA1 and cardiolipin. *Nat. Cell Biol.* **19**, 856–863 <https://doi.org/10.1038/ncb3560>
- 69 Ban, T., Kohno, H., Ishihara, T. and Ishihara, N. (2018) Relationship between OPA1 and cardiolipin in mitochondrial inner-membrane fusion. *Biochim. Biophys. Acta Bioenerg.* **1859**, 951–957 <https://doi.org/10.1016/j.bbabi.2018.05.016>
- 70 Cipolat, S., de Brito O, M., Zilio B, D. and Scorrano, L. (2004) OPA1 requires mitofusin 1 to promote mitochondrial fusion. *Proc. Natl Acad. Sci. U.S.A.* **101**, 15927–15932 <https://doi.org/10.1073/pnas.0407043101>
- 71 Zhang, Y., Liu, X., Bai, J., Tian, X., Zhao, X., Liu, W. et al. (2016) Mitoguardin regulates mitochondrial fusion through MitoPLD and is required for neuronal homeostasis. *Mol. Cell* **61**, 111–124 <https://doi.org/10.1016/j.molcel.2015.11.017>
- 72 Lee, J.Y., Kapur, M., Li, M., Choi, M.C., Choi, S., Kim, H.J. et al. (2014) MFN1 deacetylation activates adaptive mitochondrial fusion and protects metabolically challenged mitochondria. *J. Cell Sci.* **127**, 4954–4963 <https://doi.org/10.1242/jcs.157321>
- 73 Samant, S.A., Zhang, H.J., Hong, Z., Pillai, V.B., Sundaresan, N.R., Wolfgeher, D. et al. (2014) SIRT3 deacetylates and activates OPA1 to regulate mitochondrial dynamics during stress. *Mol. Cell Biol.* **34**, 807–819 <https://doi.org/10.1128/MCB.01483-13>
- 74 Lebouche, G.P., Tsai, Y.C., Yang, M., Shaw, K.C., Zhou, M., Veenstra, T.D. et al. (2012) Stress-induced phosphorylation and proteasomal degradation of mitofusin 2 facilitates mitochondrial fragmentation and apoptosis. *Mol. Cell* **47**, 547–557 <https://doi.org/10.1016/j.molcel.2012.05.041>
- 75 Yao, C.H., Wang, R., Wang, Y., Kung, C.P., Weber, J.D. and Patti, G.J. (2019) Mitochondrial fusion supports increased oxidative phosphorylation during cell proliferation. *eLife* **8**, e41351 <https://doi.org/10.7554/eLife.41351>
- 76 Buck, M.D., O'Sullivan, D., Klein Geltink, R.I., Curtis, J.D., Chang, C.H., Sanin, D.E. et al. (2016) Mitochondrial dynamics controls T cell fate through metabolic programming. *Cell* **166**, 63–76 <https://doi.org/10.1016/j.cell.2016.05.035>
- 77 Li, T., Han, J., Jia, L., Hu, X., Chen, L. and Wang, Y. (2019) PKM2 coordinates glycolysis with mitochondrial fusion and oxidative phosphorylation. *Protein Cell* **10**, 583–594 <https://doi.org/10.1007/s13238-019-0618-z>
- 78 Cassidy-Stone, A., Chipuk, J.E., Ingeman, E., Song, C., Yoo, C., Kuwana, T. et al. (2008) Chemical inhibition of the mitochondrial division dynamin reveals its role in Bax/Bak-dependent mitochondrial outer membrane permeabilization. *Dev. Cell* **14**, 193–204 <https://doi.org/10.1016/j.devcel.2007.11.019>
- 79 Pantiya, P., Thonusin, C., Chattipakorn, N. and Chattipakorn, S.C. (2020) Mitochondrial abnormalities in neurodegenerative models and possible interventions: focus on Alzheimer's disease, Parkinson's disease, Huntington's disease. *Mitochondrion* **55**, 14–47 <https://doi.org/10.1016/j.mito.2020.08.003>

- 80 Gao, F., Reynolds, M.B., Passalacqua, K.D., Sexton, J.Z., Abuaita, B.H. and O’Riordan, M.X.D. (2020) The mitochondrial fission regulator DRP1 controls post-transcriptional regulation of TNF- $\alpha$ . *Front. Cell Infect. Microbiol.* **10**, 593805 <https://doi.org/10.3389/fcimb.2020.593805>
- 81 Gao, Z., Li, Y., Wang, F., Huang, T., Fan, K., Zhang, Y. et al. (2017) Mitochondrial dynamics controls anti-tumour innate immunity by regulating CHIP-IRF1 axis stability. *Nat. Commun.* **8**, 1805 <https://doi.org/10.1038/s41467-017-01919-0>
- 82 Khodzhaeva, V., Schreiber, Y., Geisslinger, G., Brandes, R.P., Brune, B. and Namgaladze, D. (2021) Mitofusin 2 deficiency causes pro-inflammatory effects in human primary macrophages. *Front. Immunol.* **12**, 723683 <https://doi.org/10.3389/fimmu.2021.723683>
- 83 Ichinohe, T., Yamazaki, T., Koshiba, T. and Yanagi, Y. (2013) Mitochondrial protein mitofusin 2 is required for NLRP3 inflammasome activation after RNA virus infection. *Proc. Natl Acad. Sci. U.S.A.* **110**, 17963–17968 <https://doi.org/10.1073/pnas.1312571110>
- 84 Park, S., Won, J.H., Hwang, I., Hong, S., Lee, H.K. and Yu, J.W. (2015) Defective mitochondrial fission augments NLRP3 inflammasome activation. *Sci. Rep.* **5**, 15489 <https://doi.org/10.1038/srep15489>
- 85 Salter, M.W. and Beggs, S. (2014) Sublime microglia: expanding roles for the guardians of the CNS. *Cell* **158**, 15–24 <https://doi.org/10.1016/j.cell.2014.06.008>
- 86 Jin, X. and Yamashita, T. (2016) Microglia in central nervous system repair after injury. *J. Biochem.* **159**, 491–496 <https://doi.org/10.1093/jb/mvw009>
- 87 Yang, I., Han, S.J., Kaur, G., Crane, C. and Parsa, A.T. (2010) The role of microglia in central nervous system immunity and glioma immunology. *J. Clin. Neurosci.* **17**, 6–10 <https://doi.org/10.1016/j.jocn.2009.05.006>
- 88 Smith, J.A., Das, A., Ray, S.K. and Banik, N.L. (2012) Role of pro-inflammatory cytokines released from microglia in neurodegenerative diseases. *Brain Res. Bull.* **87**, 10–20 <https://doi.org/10.1016/j.brainresbull.2011.10.004>
- 89 Block, M.L., Zecca, L. and Hong, J.S. (2007) Microglia-mediated neurotoxicity: uncovering the molecular mechanisms. *Nat. Rev. Neurosci.* **8**, 57–69 <https://doi.org/10.1038/nrn2038>
- 90 Gordon, R., Albornoz, E.A., Christie, D.C., Langley, M.R., Kumar, V., Mantovani, S. et al. (2018) Inflammasome inhibition prevents alpha-synuclein pathology and dopaminergic neurodegeneration in mice. *Sci. Transl. Med.* **10**, eaah4066 <https://doi.org/10.1126/scitranslmed.aah4066>
- 91 Langston, J.W., Forno, L.S., Tetrud, J., Reeves, A.G., Kaplan, J.A. and Karluk, D. (1999) Evidence of active nerve cell degeneration in the substantia nigra of humans years after 1-methyl-4-phenyl-1,2,3,6-tetrahydropyridine exposure. *Ann. Neurol.* **46**, 598–605 [https://doi.org/10.1002/1531-8249\(199910\)46:4<598::aid-ana7>3.0.co;2-f](https://doi.org/10.1002/1531-8249(199910)46:4<598::aid-ana7>3.0.co;2-f)
- 92 Ferrari, C.C., Pott Godoy, M.C., Tarelli, R., Chertoff, M., Depino, A.M. and Pitossi, F.J. (2006) Progressive neurodegeneration and motor disabilities induced by chronic expression of IL-1 $\beta$  in the substantia nigra. *Neurobiol. Dis.* **24**, 183–193 <https://doi.org/10.1016/j.nbd.2006.06.013>
- 93 Bornemann, K.D., Wiederhold, K.H., Pauli, C., Ermini, F., Stalder, M., Schnell, L. et al. (2001) Abeta-induced inflammatory processes in microglia cells of APP23 transgenic mice. *Am. J. Pathol.* **158**, 63–73 [https://doi.org/10.1016/S0002-9440\(10\)63945-4](https://doi.org/10.1016/S0002-9440(10)63945-4)
- 94 Beier, E.E., Neal, M., Alam, G., Edler, M., Wu, L.-J. and Richardson, J.R. (2017) Alternative microglial activation is associated with cessation of progressive dopamine neuron loss in mice systemically administered lipopolysaccharide. *Neurobiol. Dis.* **108**, 115–127 <https://doi.org/10.1016/j.nbd.2017.08.009>
- 95 Qin, L., Wu, X., Block, M.L., Liu, Y., Breese, G.R., Hong, J.-S. et al. (2007) Systemic LPS causes chronic neuroinflammation and progressive neurodegeneration. *Glia* **55**, 453–462 <https://doi.org/10.1002/glia.20467>
- 96 Katoh, M., Wu, B., Nguyen, H.B., Thai, T.Q., Yamasaki, R., Lu, H. et al. (2017) Polymorphic regulation of mitochondrial fission and fusion modifies phenotypes of microglia in neuroinflammation. *Sci. Rep.* **7**, 4942 <https://doi.org/10.1038/s41598-017-05232-0>
- 97 Park, J., Min, J.-S., Chae, U., Lee, J.Y., Song, K.-S., Lee, H.-S. et al. (2017) Anti-inflammatory effect of oleuropein on microglia through regulation of Drp1-dependent mitochondrial fission. *J. Neuroimmunol.* **306**, 46–52 <https://doi.org/10.1016/j.jneuroim.2017.02.019>
- 98 Chae, U., Min, J.-S., Lee, H., Song, K.-S., Lee, H.-S., Lee, H.J. et al. (2017) Chrysophanol suppresses pro-inflammatory response in microglia via regulation of Drp1-dependent mitochondrial fission. *Immunopharmacol. Immunotoxicol.* **39**, 268–275 <https://doi.org/10.1080/08923973.2017.1344988>
- 99 Cheng, J., Zhang, R., Xu, Z., Ke, Y., Sun, R., Yang, H. et al. (2021) Early glycolytic reprogramming controls microglial inflammatory activation. *J. Neuroinflammation* **18**, 129 <https://doi.org/10.1186/s12974-021-02187-y>
- 100 Shimada, K., Crother Timothy, R., Karlin, J., Dagvadorj, J., Chiba, N., Chen, S. et al. (2012) Oxidized mitochondrial DNA activates the NLRP3 inflammasome during apoptosis. *Immunity* **36**, 401–414 <https://doi.org/10.1016/j.immuni.2012.01.009>
- 101 Christina J, G., Mishra, R., Schneider Katharina, S., Médard, G., Wettmarshausen, J., Dittlein Daniela, C. et al. (2016) K+ efflux-independent NLRP3 inflammasome activation by small molecules targeting mitochondria. *Immunity* **45**, 761–773 <https://doi.org/10.1016/j.immuni.2016.08.010>
- 102 Holley, C.L. and Schroder, K. (2020) The rOX-stars of inflammation: links between the inflammasome and mitochondrial meltdown. *Clin. Transl. Immunol.* **9**, e01109 <https://doi.org/10.1002/cti2.1109>
- 103 Zhang, X.-L., Huang, W.-M., Tang, P.-C., Sun, Y., Zhang, X., Qiu, L. et al. (2021) Anti-inflammatory and neuroprotective effects of natural cordycepin in rotenone-induced PD models through inhibiting Drp1-mediated mitochondrial fission. *Neurotoxicology* **84**, 1–13 <https://doi.org/10.1016/j.neuro.2021.02.002>
- 104 Liu, R., Wang, S.-C., Li, M., Ma, X.-H., Jia, X.-N., Bu, Y. et al. (2020) An inhibitor of DRP1 (Mdivi-1) alleviates LPS-induced septic AKI by inhibiting NLRP3 inflammasome activation. *Biomed. Res. Int.* **2020**, 2398420-11 <https://doi.org/10.1155/2020/2398420>
- 105 Bido, S., Soria, F.N., Fan, R.Z., Bezdard, E. and Tieu, K. (2017) Mitochondrial division inhibitor-1 is neuroprotective in the A53T- $\alpha$ -synuclein rat model of Parkinson’s disease. *Sci. Rep.* **7**, 7495–7413 <https://doi.org/10.1038/s41598-017-07181-0>
- 106 Qi, X., Qvit, N., Su, Y.C. and Mochly-Rosen, D. (2013) A novel Drp1 inhibitor diminishes aberrant mitochondrial fission and neurotoxicity. *J. Cell Sci.* **126**, 789–802 <https://doi.org/10.1242/jcs.114439>
- 107 Filichia, E., Hoffer, B., Qi, X. and Luo, Y. (2016) Inhibition of Drp1 mitochondrial translocation provides neural protection in dopaminergic system in a Parkinson’s disease model induced by MPTP. *Sci. Rep.* **6**, 32656 <https://doi.org/10.1038/srep32656>
- 108 Wang, Y., Subramanian, M., Yurdagul, Jr, A., Barbosa-Lorenzi, V.C., Cai, B., de Juan-Sanz, J. et al. (2017) Mitochondrial fission promotes the continued clearance of apoptotic cells by macrophages. *Cell* **171**, 331–345.e22 <https://doi.org/10.1016/j.cell.2017.08.041>
- 109 Li, J., Ye, Y., Liu, Z., Zhang, G., Dai, H., Li, J. et al. (2022) Macrophage mitochondrial fission improves cancer cell phagocytosis induced by therapeutic antibodies and is impaired by glutamine competition. *Nat. Cancer* **3**, 453–470 <https://doi.org/10.1038/s43018-022-00354-5>
- 110 Tur, J., Pereira-Lopes, S., Vico, T., Marin, E.A., Munoz, J.P., Hernandez-Alvarez, M. et al. (2020) Mitofusin 2 in macrophages links mitochondrial ROS production, cytokine release, phagocytosis, autophagy, and bactericidal activity. *Cell Rep.* **32**, 108079 <https://doi.org/10.1016/j.celrep.2020.108079>

- 111 Stavru, F., Bouillaud, F., Sartori, A., Ricquier, D. and Cossart, P. (2011) *Listeria monocytogenes* transiently alters mitochondrial dynamics during infection. *Proc. Natl Acad. Sci. U.S.A.* **108**, 3612–3617 <https://doi.org/10.1073/pnas.1100126108>
- 112 Escoll, P., Song, O.R., Viana, F., Steiner, B., Lagache, T., Olivo-Marin, J.C. et al. (2017) *Legionella pneumophila* modulates mitochondrial dynamics to trigger metabolic repurposing of infected macrophages. *Cell Host Microbe* **22**, 302–316.e7 <https://doi.org/10.1016/j.chom.2017.07.020>
- 113 Uo, T., Dworzak, J., Kinoshita, C., Inman, D.M., Kinoshita, Y., Horner, P.J. et al. (2009) Drp1 levels constitutively regulate mitochondrial dynamics and cell survival in cortical neurons. *Exp. Neurol.* **218**, 274–285 <https://doi.org/10.1016/j.expneurol.2009.05.010>
- 114 Strack, S., Wilson, T.J. and Cribbs, J.T. (2013) Cyclin-dependent kinases regulate splice-specific targeting of dynamin-related protein 1 to microtubules. *J. Cell Biol.* **201**, 1037–1051 <https://doi.org/10.1083/jcb.201210045>
- 115 Macdonald, P.J., Francy, C.A., Stepanyants, N., Lehman, L., Baglio, A., Mears, J.A. et al. (2016) Distinct splice variants of dynamin-related protein 1 differentially utilize mitochondrial fission factor as an effector of cooperative GTPase activity. *J. Biol. Chem.* **291**, 493–507 <https://doi.org/10.1074/jbc.M115.680181>
- 116 Kamerkar, S.C., Kraus, F., Sharpe, A.J., Pucadyil, T.J. and Ryan, M.T. (2018) Dynamin-related protein 1 has membrane constricting and severing abilities sufficient for mitochondrial and peroxisomal fission. *Nat. Commun.* **9**, 5239 <https://doi.org/10.1038/s41467-018-07543-w>
- 117 Schrader, M. (2006) Shared components of mitochondrial and peroxisomal division. *Biochim. Biophys. Acta* **1763**, 531–541 <https://doi.org/10.1016/j.bbamcr.2006.01.004>
- 118 Pang, Y., Zhang, C. and Gao, J. (2021) Macrophages as emerging key players in mitochondrial transfers. *Front. Cell Dev. Biol.* **9**, 747377 <https://doi.org/10.3389/fcell.2021.747377>
- 119 Saha, T., Dash, C., Jayabalan, R., Khiste, S., Kulkarni, A., Kurmi, K. et al. (2022) Intercellular nanotubes mediate mitochondrial trafficking between cancer and immune cells. *Nanotechnol.* **17**, 98–106 <https://doi.org/10.1038/s41565-021-01000-4>
- 120 Jackson, M.V., Morrison, T.J., Doherty, D.F., McAuley, D.F., Matthay, M.A., Kissenpfennig, A. et al. (2016) Mitochondrial transfer via tunneling nanotubes is an important mechanism by which mesenchymal stem cells enhance macrophage phagocytosis in the in vitro and in vivo models of ARDS. *Stem Cells* **34**, 2210–2223 <https://doi.org/10.1002/stem.2372>
- 121 Brestoff, J.R., Wilen, C.B., Moley, J.R., Li, Y., Zou, W., Malvin, N.P. et al. (2021) Intercellular mitochondria transfer to macrophages regulates white adipose tissue homeostasis and is impaired in obesity. *Cell Metab.* **33**, 270–282.e8 <https://doi.org/10.1016/j.cmet.2020.11.008>
- 122 Borcherding, N., Jia, W., Giwa, R., Field, R.L., Moley, J.R., Kopeccky, B.J. et al. (2022) Dietary lipids inhibit mitochondrial transfer to macrophages to divert adipocyte-derived mitochondria into the blood. *Cell Metab.* **34**, 1499–1513.e8 <https://doi.org/10.1016/j.cmet.2022.08.010>
- 123 Vincent, A.E., Turnbull, D.M., Eisner, V., Hajnoczky, G. and Picard, M. (2017) Mitochondrial nanotunnels. *Trends Cell Biol.* **27**, 787–799 <https://doi.org/10.1016/j.tcb.2017.08.009>
- 124 Picard, M., McManus, M.J., Csordas, G., Varnai, P., Dorn, II, G.W., Williams, D. et al. (2015) Trans-mitochondrial coordination of cristae at regulated membrane junctions. *Nat. Commun.* **6**, 6259 <https://doi.org/10.1038/ncomms7259>
- 125 Taguchi, N., Ishihara, N., Jofuku, A., Oka, T. and Mihara, K. (2007) Mitotic phosphorylation of dynamin-related GTPase Drp1 participates in mitochondrial fission. *J. Biol. Chem.* **282**, 11521–11529 <https://doi.org/10.1074/jbc.M607279200>
- 126 Mukherjee, A., Patra, U., Bhowmick, R. and Chawla-Sarkar, M. (2018) Rotaviral nonstructural protein 4 triggers dynamin-related protein 1-dependent mitochondrial fragmentation during infection. *Cell Microbiol.* **20**, e12831 <https://doi.org/10.1111/cmi.12831>
- 127 Lu, Y.T., Li, L.Z., Yang, Y.L., Yin, X., Liu, Q., Zhang, L. et al. (2018) Succinate induces aberrant mitochondrial fission in cardiomyocytes through GPR91 signaling. *Cell Death Dis.* **9**, 672 <https://doi.org/10.1038/s41419-018-0708-5>
- 128 Kashatus, J.A., Nascimento, A., Myers, L.J., Sher, A., Byrne, F.L., Hoehn, K.L. et al. (2015) Erk2 phosphorylation of Drp1 promotes mitochondrial fission and MAPK-driven tumor growth. *Mol. Cell* **57**, 537–551 <https://doi.org/10.1016/j.molcel.2015.01.002>
- 129 Roe, A.J. and Qi, X. (2018) Drp1 phosphorylation by MAPK1 causes mitochondrial dysfunction in cell culture model of Huntington's disease. *Biochem. Biophys. Res. Commun.* **496**, 706–711 <https://doi.org/10.1016/j.bbrc.2018.01.114>
- 130 Han, H., Tan, J., Wang, R., Wan, H., He, Y., Yan, X. et al. (2020) PINK1 phosphorylates Drp1(S616) to regulate mitophagy-independent mitochondrial dynamics. *EMBO Rep.* **21**, e48686 <https://doi.org/10.15252/embr.201948686>
- 131 Gao, Q., Tian, R., Han, H., Stone, J., Wang, C., Ke, X. et al. (2022) PINK1-mediated drp1(S616) phosphorylation modulates synaptic development and plasticity via promoting mitochondrial fission. *Signal. Transduct. Target. Ther.* **7**, 103 <https://doi.org/10.1038/s41392-022-00933-z>
- 132 Xie, Q., Wu, Q., Horbinski, C.M., Flavahan, W.A., Yang, K., Zhou, W. et al. (2015) Mitochondrial control by DRP1 in brain tumor initiating cells. *Nat. Neurosci.* **18**, 501–510 <https://doi.org/10.1038/nn.3960>
- 133 Rong, R., Xia, X., Peng, H., Li, H., You, M., Liang, Z. et al. (2020) Cdk5-mediated Drp1 phosphorylation drives mitochondrial defects and neuronal apoptosis in radiation-induced optic neuropathy. *Cell Death Dis.* **11**, 720 <https://doi.org/10.1038/s41419-020-02922-y>
- 134 Cho, B., Cho, H.M., Kim, H.J., Jeong, J., Park, S.K., Hwang, E.M. et al. (2014) CDK5-dependent inhibitory phosphorylation of Drp1 during neuronal maturation. *Exp. Mol. Med.* **46**, e105 <https://doi.org/10.1038/emm.2014.36>
- 135 Xu, S., Wang, P., Zhang, H., Gong, G., Gutierrez Cortes, N., Zhu, W. et al. (2016) CaMKII induces permeability transition through Drp1 phosphorylation during chronic beta-AR stimulation. *Nat. Commun.* **7**, 13189 <https://doi.org/10.1038/ncomms13189>
- 136 Chen, S., Liu, S., Wang, J., Wu, Q., Wang, A., Guan, H. et al. (2020) TBK1-mediated DRP1 targeting confers nucleic acid sensing to reprogram mitochondrial dynamics and physiology. *Mol. Cell* **80**, 810–827.e7 <https://doi.org/10.1016/j.molcel.2020.10.018>
- 137 Cribbs, J.T. and Strack, S. (2007) Reversible phosphorylation of Drp1 by cyclic AMP-dependent protein kinase and calcineurin regulates mitochondrial fission and cell death. *EMBO Rep.* **8**, 939–944 <https://doi.org/10.1038/sj.embor.7401062>
- 138 Han, X.J., Lu, Y.F., Li, S.A., Kaitsuka, T., Sato, Y., Tomizawa, K. et al. (2008) Cam kinase I alpha-induced phosphorylation of Drp1 regulates mitochondrial morphology. *J. Cell Biol.* **182**, 573–585 <https://doi.org/10.1083/jcb.200802164>
- 139 Su, Y.C. and Qi, X. (2013) Inhibition of excessive mitochondrial fission reduced aberrant autophagy and neuronal damage caused by LRRK2 G2019S mutation. *Hum. Mol. Genet.* **22**, 4545–4561 <https://doi.org/10.1093/hmg/ddt301>
- 140 Merrill, R.A., Slupe, A.M. and Strack, S. (2013) N-terminal phosphorylation of protein phosphatase 2A/Bbeta2 regulates translocation to mitochondria, dynamin-related protein 1 dephosphorylation, and neuronal survival. *FEBS J.* **280**, 662–673 <https://doi.org/10.1111/j.1742-4658.2012.08631.x>
- 141 Cho, D.H., Nakamura, T., Fang, J., Cieplak, P., Godzik, A., Gu, Z. et al. (2009) S-nitrosylation of Drp1 mediates beta-amyloid-related mitochondrial fission and neuronal injury. *Science* **324**, 102–105 <https://doi.org/10.1126/science.1171091>

- 142 Lee, D.S. and Kim, J.E. (2018) PDI-mediated S-nitrosylation of DRP1 facilitates DRP1-S616 phosphorylation and mitochondrial fission in CA1 neurons. *Cell Death Dis.* **9**, 869 <https://doi.org/10.1038/s41419-018-0910-5>
- 143 Braschi, E., Zunino, R. and McBride, H.M. (2009) MAPL is a new mitochondrial SUMO E3 ligase that regulates mitochondrial fission. *EMBO Rep.* **10**, 748–754 <https://doi.org/10.1038/embor.2009.86>
- 144 Zunino, R., Schauss, A., Rippstein, P., Andrade-Navarro, M. and McBride, H.M. (2007) The SUMO protease SENP5 is required to maintain mitochondrial morphology and function. *J. Cell Sci.* **120**, 1178–1188 <https://doi.org/10.1242/jcs.03418>
- 145 Guo, C., Hildick, K.L., Luo, J., Dearden, L., Wilkinson, K.A. and Henley, J.M. (2013) SENP3-mediated deSUMOylation of dynamin-related protein 1 promotes cell death following ischaemia. *EMBO J.* **32**, 1514–1528 <https://doi.org/10.1038/emboj.2013.65>
- 146 Guo, C., Wilkinson, K.A., Evans, A.J., Rubin, P.P. and Henley, J.M. (2017) SENP3-mediated deSUMOylation of Drp1 facilitates interaction with Mff to promote cell death. *Sci. Rep.* **7**, 43811 <https://doi.org/10.1038/srep43811>
- 147 Karbowski, M., Neutzner, A. and Youle, R.J. (2007) The mitochondrial E3 ubiquitin ligase MARCH5 is required for Drp1 dependent mitochondrial division. *J. Cell Biol.* **178**, 71–84 <https://doi.org/10.1083/jcb.200611064>
- 148 Nakamura, N., Kimura, Y., Tokuda, M., Honda, S. and Hirose, S. (2006) MARCH-V is a novel mitofusin 2- and Drp1-binding protein able to change mitochondrial morphology. *EMBO Rep.* **7**, 1019–1022 <https://doi.org/10.1038/sj.embor.7400790>
- 149 Yonashiro, R., Ishido, S., Kyo, S., Fukuda, T., Goto, E., Matsuki, Y. et al. (2006) A novel mitochondrial ubiquitin ligase plays a critical role in mitochondrial dynamics. *EMBO J.* **25**, 3618–3626 <https://doi.org/10.1038/sj.emboj.7601249>
- 150 Hu, Q., Zhang, H., Gutierrez Cortes, N., Wu, D., Wang, P., Zhang, J. et al. (2020) Increased Drp1 acetylation by lipid overload induces cardiomyocyte death and heart dysfunction. *Circ. Res.* **126**, 456–470 <https://doi.org/10.1161/CIRCRESAHA.119.315252>
- 151 Shen, Y.L., Shi, Y.Z., Chen, G.G., Wang, L.L., Zheng, M.Z., Jin, H.F. et al. (2018) TNF-alpha induces Drp1-mediated mitochondrial fragmentation during inflammatory cardiomyocyte injury. *Int. J. Mol. Med.* **41**, 2317–2327 <https://doi.org/10.3892/ijmm.2018.3385>
- 152 Lum, M. and Morona, R. (2014) Dynamin-related protein Drp1 and mitochondria are important for *Shigella flexneri* infection. *Int. J. Med. Microbiol.* **304**, 530–541 <https://doi.org/10.1016/j.ijmm.2014.03.006>
- 153 Chowdhury, S.R., Reimer, A., Sharan, M., Kozjak-Pavlovic, V., Eulalio, A., Prusty, B.K. et al. (2017) Chlamydia preserves the mitochondrial network necessary for replication via microRNA-dependent inhibition of fission. *J. Cell Biol.* **216**, 1071–1089 <https://doi.org/10.1083/jcb.201608063>
- 154 Suzuki, M., Danilchanka, O. and Mekalanos, J.J. (2014) *Vibrio cholerae* T3SS effector VopE modulates mitochondrial dynamics and innate immune signaling by targeting Miro GTPases. *Cell Host Microbe* **16**, 581–591 <https://doi.org/10.1016/j.chom.2014.09.015>
- 155 Stavru, F., Palmer, A.E., Wang, C., Youle, R.J. and Cossart, P. (2013) Atypical mitochondrial fission upon bacterial infection. *Proc. Natl Acad. Sci. U.S.A.* **110**, 16003–16008 <https://doi.org/10.1073/pnas.1315784110>
- 156 Jain, P., Luo, Z.Q. and Blanke, S.R. (2011) *Helicobacter pylori* vacuolating cytotoxin A (VacA) engages the mitochondrial fission machinery to induce host cell death. *Proc. Natl Acad. Sci. U.S.A.* **108**, 16032–16037 <https://doi.org/10.1073/pnas.1105175108>
- 157 Chatel-Chaix, L., Cortese, M., Romero-Brey, I., Bender, S., Neufeldt, C.J., Fischl, W. et al. (2016) Dengue virus perturbs mitochondrial morphodynamics to dampen innate immune responses. *Cell Host Microbe* **20**, 342–356 <https://doi.org/10.1016/j.chom.2016.07.008>
- 158 Barbier, V., Lang, D., Valois, S., Rothman, A.L. and Medin, C.L. (2017) Dengue virus induces mitochondrial elongation through impairment of Drp1-triggered mitochondrial fission. *Virology* **500**, 149–160 <https://doi.org/10.1016/j.virol.2016.10.022>
- 159 Castanier, C., Garcin, D., Vazquez, A. and Arnoult, D. (2010) Mitochondrial dynamics regulate the RIG-I-like receptor antiviral pathway. *EMBO Rep.* **11**, 133–138 <https://doi.org/10.1038/embor.2009.258>
- 160 Keck, F., Brooks-Faulconer, T., Lark, T., Ravishankar, P., Bailey, C., Salvador-Morales, C. et al. (2017) Altered mitochondrial dynamics as a consequence of Venezuelan equine encephalitis virus infection. *Virulence* **8**, 1849–1866 <https://doi.org/10.1080/21505594.2016.1276690>
- 161 Pal, A.D., Basak, N.P., Banerjee, A.S. and Banerjee, S. (2014) Epstein-Barr virus latent membrane protein-2A alters mitochondrial dynamics promoting cellular migration mediated by Notch signaling pathway. *Carcinogenesis* **35**, 1592–1601 <https://doi.org/10.1093/carcin/bgu069>
- 162 Shi, C.S., Qi, H.Y., Boullaran, C., Huang, N.N., Abu-Asab, M., Shelhamer, J.H. et al. (2014) SARS-coronavirus open reading frame-9b suppresses innate immunity by targeting mitochondria and the MAVS/TRAF3/TRAF6 signalosome. *J. Immunol.* **193**, 3080–3089 <https://doi.org/10.4049/jimmunol.1303196>
- 163 Varga, Z.T., Grant, A., Manicassamy, B. and Palese, P. (2012) Influenza virus protein PB1-F2 inhibits the induction of type I interferon by binding to MAVS and decreasing mitochondrial membrane potential. *J. Virol.* **86**, 8359–8366 <https://doi.org/10.1128/JVI.01122-12>
- 164 Yoshizumi, T., Ichinohe, T., Sasaki, O., Otera, H., Kawabata, S., Mihara, K. et al. (2014) Influenza A virus protein PB1-F2 translocates into mitochondria via Tom40 channels and impairs innate immunity. *Nat. Commun.* **5**, 4713 <https://doi.org/10.1038/ncomms5713>
- 165 Kim, S.J., Khan, M., Quan, J., Till, A., Subramani, S. and Siddiqui, A. (2013) Hepatitis B virus disrupts mitochondrial dynamics: induces fission and mitophagy to attenuate apoptosis. *PLoS Pathog.* **9**, e1003722 <https://doi.org/10.1371/journal.ppat.1003722>
- 166 Kim, S.J., Syed, G.H., Khan, M., Chiu, W.W., Sohail, M.A., Gish, R.G. et al. (2014) Hepatitis C virus triggers mitochondrial fission and attenuates apoptosis to promote viral persistence. *Proc. Natl Acad. Sci. U.S.A.* **111**, 6413–6418 <https://doi.org/10.1073/pnas.1321141111>
